# Supplementary material for: Statistically representative databases for density functional theoryviadata science
Source: Royal Society of Chemistry journal article supplement (doi:10.1039/c9cp03211h), 2019-01-01
Supplement: c9cp03211h1.xlsx [file c9cp03211h1.xlsx]

## Sheet: ASCDB
ASCDB - A Smaller Chemistry DataBase
All values are in kcal/mol.
Name of database	MUE	MSE	RMSE	MAX |e|	MIN |e|		Name of subset	Label	MUE	MSE	RMSE	MAX |e|	MIN |e|		Name of subset	Label	MUE	MSE	RMSE	MAX |e|	MIN |e|
ASCDB	1055.95	742.76	3459	23748.1	0.02		Non-covalent: Easy	NCE15	17.63	-15.48	45.53	171.8	0.02		Nonlocality Error Dominated: Mixed Easy	NLME15	1701.33	1548.04	6134.44	23748.1	2.68
Non-Covalent	62.71	-27.18	116.06	582.22	0.02		Non-covalent: Hard	NCH21	94.78	-67.26	163.48	582.22	1.18		Nonlocality Error Dominated: Mixed Hard	NLMH7	348.46	-222.53	513.55	1254.32	87.85
Thermochemistry	311.71	-111.34	793.85	4621.46	2.27		Non-Covalent: Cluster	NCC21	42.45	-8.71	65.18	169.86	0.42		Nonlocality Error Dominated: MR	NLMR11	147.24	-147.24	185.67	365.2	19.88
Nonlocality Error Dominated	730.82	450.66	3674.15	23748.1	2.68		Non-Covalent: Water	NCW3	205.33	65.53	205.42	209.7	196.59		Nonlocality Error Dominated: SIE	NLSIE9	123.97	-123.97	175.89	381.43	16.9
Unbiased Calculations	4158.68	3629.87	6858.23	18390.9	69.03		Thermochemistry: Atomization and Reaction energies	TARE19	116.83	-36.57	179.87	420.42	2.77		Unbiased Calculations: Mindless Benchmarks Moderately Hard	UCMBMH8	445.17	-445.17	491.34	664.56	69.03
							Thermochemistry: Barrier Heights Easy	TBHE20	165.88	70.84	261.88	704.1	2.27		Unbiased Calculations: Mindless Benchmarks Hard	UCMBH5	352.91	-207.71	364.53	501.85	216.1
							Thermochemistry: Barrier Heights Hard	TBHH16	133.84	-10.25	189.62	577.78	10.4		Unbiased Calculations: Mindless Benchmarks Very Hard	UCMBVH7	726.35	-726.35	748.34	1070.64	518.66
Paste the calculated results in the yellow column. The Excel file will do the rest.							Thermochemistry: Alkanes Reactions	TALK5	2204.76	-1447.58	2655.18	4621.46	84.51		Unbiased Calculations: AE18pE	UCAE18	8201.08	8201.08	9946.6	18390.9	313.75
Units below are in Hartrees (unless noted otherwise)	Calculated energies ↓							Units here are kcal/mol
Molecules	Energies		DATAPOINTS			Calculated	Reference	Calc-Ref	|e| (kcal/mol)		CALCULATED ENERGIES													COEFFICIENTS
005_C2H2_SR-MGN-BE107			MN_NCCE30_16	NCE15_1		0	3.3509	-3.3509	3.3509		0	0	0											-1	1	1
01_Ca_MR-MGM-BE4			MN_PA8_2	NCE15_2		0	171.8	-171.8	171.8		0	0												-1	1
02_CaO_MR-MGM-BE4			MGCDB84_Butanediol65_5	NCE15_3		0	1.44927	-1.44927	1.44927		0	0												1	-1
02_Cr2_MR-TMD-BE3			MGCDB84_NHTBH38_38	NCE15_4		0	33.11	-33.11	33.11		0	0												-1	1
03_adamantane			MGCDB84_RG10_268	NCE15_5		0	-0.0173806	0.0173806	0.0173806		0	0												1	-2
03_Fe_MR-TMD-BE3			MGCDB84_RG10_457	NCE15_6		0	-0.0860521	0.0860521	0.0860521		0	0												1	-2
038_CH2_1A1_SR-MGN-BE107			MGCDB84_S66x8_35	NCE15_7		0	-5.75	5.75	5.75		0	0												1	-2
04_Fe2_MR-TMD-BE3			MGCDB84_YMPJ519_33	NCE15_8		0	14.4404	-14.4404	14.4404		0	0												1	-1
04_Ge1_4pIsoE4			MGCDB84_YMPJ519_122	NCE15_9		0	3.03921	-3.03921	3.03921		0	0												1	-1
049_CH3NH2_SR-MGN-BE107			MGCDB84_YMPJ519_283	NCE15_10		0	6.22654	-6.22654	6.22654		0	0												1	-1
05_Ge2_4pIsoE4			MGCDB84_YMPJ519_465	NCE15_11		0	6.23679	-6.23679	6.23679		0	0												1	-1
05_H2O_PA8			GMTKN55_Amino20x4_58	NCE15_12		0	3.211	-3.211	3.211		0	0												-1	1
05_V_MR-TMD-BE3			GMTKN55_Amino20x4_80	NCE15_13		0	1.484	-1.484	1.484		0	0												-1	1
06_ClO_MR-MGN-BE17			GMTKN55_BH76RC_18	NCE15_14		0	-10.32	10.32	10.32		0	0	0	0										-1	-1	1	1
06_ethylene			GMTKN55_PNICO23_13	NCE15_15		0	3.98	-3.98	3.98		0	0												-1	2
06_LiO-_MR-MGM-BE4			MN_SR-MGN-BE107_76	NCH21_1		0	582.22	-582.22	582.22		0	0	0	0										-1	1	1	5
06_Ru+_es_4dAEE5			MN_NCCE30_8	NCH21_2		0	1.80999	-1.80999	1.80999		0	0	0											-1	1	1
06_V2_MR-TMD-BE3			MN_4pIsoE4_3	NCH21_3		0	24.6	-24.6	24.6		0	0												-1	1
060_CH_2pi_SR-MGN-BE107			MGCDB84_Bauza30_9	NCH21_4		0	-40.96	40.96	40.96		0	0	0											1	-1	-1
07_ethyne			MGCDB84_G21IP_18	NCH21_5		0	300.917	-300.917	300.917		0	0												1	-1
07_Ru+_gs_4dAEE5			MGCDB84_NBC10_78	NCH21_6		0	-2.703	2.703	2.703		0	0												1	-2
08_H3O+_PA8			MGCDB84_S66x8_108	NCH21_7		0	-7.28999	7.28999	7.28999		0	0	0											1	-1	-1
09_O-_MR-MGM-BE4			MGCDB84_Styrene45_16	NCH21_8		0	45.78	-45.78	45.78		0	0												1	-1
09c_acetamide_monC_3B-69			MGCDB84_BDE99nonMR_95	NCH21_9		0	-86.3199	86.3199	86.3199		0	0	0											1	-1	-1
09c_acetamide_trim_3B-69			MGCDB84_HAT707nonMR_194	NCH21_10		0	135.73	-135.73	135.73		0	0	0	0										1	1	-1	-1
10_CoH_SR-TM-BE17			MGCDB84_HAT707nonMR_472	NCH21_11		0	-68.7399	68.7399	68.7399		0	0	0	0										1	1	-1	-1
101_acetaldehyde_W4-11			MGCDB84_HAT707MR_349	NCH21_12		0	60.48	-60.48	60.48		0	0	0	0										1	1	-1	-1
104_alcl_W4-11			MGCDB84_ISOMERIZATION20_18	NCH21_13		0	-26.34	26.34	26.34		0	0												1	-1
11_B1_Butanediol65			MGCDB84_3B-69-DIM_109	NCH21_14		0	-9.89799	9.89799	9.89799		0	0	0											1	-1	-1
11_BCl3_NBPRC			GMTKN55_ALKBDE10_1	NCH21_15		0	138.7	-138.7	138.7		0	0	0											-1	1	1
11_Co_atm_SR-TM-BE17			GMTKN55_FH51_12	NCH21_16		0	-46.72	46.72	46.72		0	0	0											-1	-1	1
11_H_AE18			GMTKN55_G21EA_10	NCH21_17		0	1.2	-1.2	1.2		0	0												1	-1
11_H2O_H2O20Bind4			GMTKN55_PA26_20	NCH21_18		0	181.9	-181.9	181.9		0	0												1	-1
11_H2O_TA13			GMTKN55_RG18_6	NCH21_19		0	1.18	-1.18	1.18		0	0												-1	3
11_Isomer1_Styrene45			GMTKN55_W4-11_7	NCH21_20		0	190.745	-190.745	190.745		0	0	0											-1	1	2
11_SB-10_pTC13			GMTKN55_WCPT18_2	NCH21_21		0	36.21	-36.21	36.21		0	0												-1	1
110_allene_W4-11			MGCDB84_NBPRC_11	NCC21_1		0	-30.8	30.8	30.8		0	0	0											1	-1	-1
12_12_G21IP			MGCDB84_BH76RC_10	NCC21_2		0	-19.51	19.51	19.51		0	0	0											-1	-1	1
12_BCl3PMe3_NBPRC			MGCDB84_NBC10_166	NCC21_3		0	9.34099	-9.34099	9.34099		0	0	0											1	-1	-1
12_boat-b_H2O16Rel5			MGCDB84_S22_15	NCC21_4		0	-4.255	4.255	4.255		0	0												1	-2
12_C6H6_Platonic24			MGCDB84_S66_26	NCC21_5		0	-9.77099	9.77099	9.77099		0	0												1	-2
12_He_AE18			MGCDB84_Shields38_12	NCC21_6		0	-34.88	34.88	34.88		0	0												1	-5
12_SB-10H_pTC13			MGCDB84_SW49Bind345_31	NCC21_7		0	-41.1571	41.1571	41.1571		0	0	0											1	-1	-2
126_c2h2_W4-11			MGCDB84_BDE99nonMR_75	NCC21_8		0	-107.63	107.63	107.63		0	0	0											1	-1	-1
128_c2h4_W4-11			MGCDB84_3B-69-TRIM_27	NCC21_9		0	-17.326	17.326	17.326		0	0												1	-3
13_c2h6_BSR36			MGCDB84_3B-69-TRIM_47	NCC21_10		0	-28.207	28.207	28.207		0	0												1	-3
13_C8H8_Platonic24			MGCDB84_H2O16Rel5_2	NCC21_11		0	0.421	-0.421	0.421		0	0												1	-1
13_Cl2+_IP13			MGCDB84_BSR36_22	NCC21_12		0	9.12999	-9.12999	9.12999		0	0	0											7	-1	-7
13_H2O20es_H2O20Bind4			MGCDB84_HNBrBDE18_7	NCC21_13		0	56.9789	-56.9789	56.9789		0	0	0											-1	1	1
13_Li_AE18			GMTKN55_ADIM6_5	NCC21_14		0	4.6	-4.6	4.6		0	0												2	-1
13_o2_DC9			GMTKN55_BSR36_23	NCC21_15		0	10.1	-10.1	10.1		0	0	0											7	-1	-7
132_Cysteine_xac_YMPJ519			GMTKN55_DARC_2	NCC21_16		0	-60.8	60.8	60.8		0	0	0											-1	-1	1
136_cf_W4-11			GMTKN55_ISOL24_17	NCC21_17		0	9.83	-9.83	9.83		0	0												-1	1
138_ch2ch_W4-11			GMTKN55_PCONF21_11	NCC21_18		0	1.07	-1.07	1.07		0	0												-1	1
138_Cysteine_xai_YMPJ519			GMTKN55_WATER27_19	NCC21_19		0	114.9	-114.9	114.9		0	0	0											-1	1	6
14_4444-a_H2O16Rel5			MN_MR-TM-BE13_13	NCC21_20		0	150.979	-150.979	150.979		0	0	0											-1	1	1
14_Be_AE18			MN_IP23_20	NCC21_21		0	169.862	-169.862	169.862		0	0												-1	1
14_C10H10_Platonic24			MGCDB84_H2O20Bind4_2	NCW3_1		0	-209.7	209.7	209.7		0	0												1	-20
14_Cl2_IP13			MGCDB84_H2O20Bind10_10	NCW3_2		0	-196.59	196.59	196.59		0	0												1	-20
14_CrCl2_SR-TM-BE17			GMTKN55_WATER27_14	NCW3_3		0	209.7	-209.7	209.7		0	0												-1	20
143_ch2-trip_W4-11			MN_SR-TM-BE17_1	ARE19_1		0	181.13	-181.13	181.13		0	0	0											-1	1	2
144_ch3_W4-11			MN_SR-TM-BE17_9	ARE19_2		0	47.2	-47.2	47.2		0	0												-1	2
14a_cyanoacetamide_dimBC_3B-69			MN_4dAEE5_4	ARE19_3		0	21.9628	-21.9628	21.9628		0	0												-1	1
14a_cyanoacetamide_monB_3B-69			MGCDB84_EA13_6	ARE19_4		0	42.3	-42.3	42.3		0	0												1	-1
14a_cyanoacetamide_monC_3B-69			MGCDB84_HAT707nonMR_64	ARE19_5		0	-97.1299	97.1299	97.1299		0	0	0	0										1	1	-1	-1
15_B_AE18			MGCDB84_HAT707nonMR_227	ARE19_6		0	-27.93	27.93	27.93		0	0	0	0										1	1	-1	-1
15_B5_Butanediol65			MGCDB84_HAT707MR_265	ARE19_7		0	58.15	-58.15	58.15		0	0	0	0										1	1	-1	-1
15_C12H12_Platonic24			MGCDB84_HAT707nonMR_302	ARE19_8		0	83.1999	-83.1999	83.1999		0	0	0	0										1	1	-1	-1
15_NeNe_4p3_RG10			MGCDB84_HAT707nonMR_466	ARE19_9		0	7.85999	-7.85999	7.85999		0	0	0	0										1	1	-1	-1
150_ch_W4-11			MGCDB84_HAT707MR_484	ARE19_10		0	68.6999	-68.6999	68.6999		0	0	0	0										1	1	-1	-1
157_clf_W4-11			MGCDB84_HAT707MR_513	ARE19_11		0	2.77	-2.77	2.77		0	0	0	0										1	1	-1	-1
158_clo_W4-11			MGCDB84_TAE140nonMR_11	ARE19_12		0	-420.42	420.42	420.42		0	0	0											1	-1	-4
159_cloo_W4-11			MGCDB84_TAE140nonMR_36	ARE19_13		0	-141.64	141.64	141.64		0	0	0											1	-1	-1
16_C_AE18			MGCDB84_TAE140nonMR_120	ARE19_14		0	-39.042	39.042	39.042		0	0												1	-2
16_C20H20_Platonic24			GMTKN55_G21EA_13	ARE19_15		0	41.7	-41.7	41.7		0	0												1	-1
16_p4_DC9			GMTKN55_G2RC_14	ARE19_16		0	-36.32	36.32	36.32		0	0	0	0										-1	-3	1	1
161_cn_W4-11			GMTKN55_ISOL24_1	ARE19_17		0	71.01	-71.01	71.01		0	0												-1	1
163_co_W4-11			GMTKN55_W4-11_11	ARE19_18		0	420.42	-420.42	420.42		0	0	0											-1	1	4
164_cs2_W4-11			GMTKN55_W4-11_34	ARE19_19		0	410.973	-410.973	410.973		0	0	0	0										-1	1	1	2
165_cs_W4-11			MN_SR-MGN-BE107_43	BHE20_1		0	405.35	-405.35	405.35		0	0	0											-1	2	2
168_f2co_W4-11			MN_ABDE13_6	BHE20_2		0	80.2	-80.2	80.2		0	0	0											-1	1	1
169_f2_W4-11			MN_MR-MGN-BE17_7	BHE20_3		0	64.8399	-64.8399	64.8399		0	0	0											-1	1	1
16b_triazolidinedione_monA_3B-69			MN_HTBH38_3	BHE20_4		0	4.9	-4.9	4.9		0	0	0											-1	-1	1
16b_triazolidinedione_trim_3B-69			MGCDB84_WATER27_23	BHE20_5		0	28.5	-28.5	28.5		0	0												1	-1
17_ch4_BSR36			MGCDB84_NHTBH38_9	BHE20_6		0	2.27	-2.27	2.27		0	0	0											-1	-1	1
17_Cu_SR-TM-BE17			MGCDB84_IP13_2	BHE20_7		0	265.3	-265.3	265.3		0	0												1	-1
17_Isomer7_FmH2O10			MGCDB84_TA13_6	BHE20_8		0	-3.82887	3.82887	3.82887		0	0	0											1	-1	-1
17_Isomer7_mon1_FmH2O10			MGCDB84_HAT707nonMR_219	BHE20_9		0	38.98	-38.98	38.98		0	0	0	0										1	1	-1	-1
17_Isomer7_mon10_FmH2O10			MGCDB84_HAT707nonMR_409	BHE20_10		0	-59.82	59.82	59.82		0	0	0	0										1	1	-1	-1
17_Isomer7_mon11_FmH2O10			MGCDB84_HAT707nonMR_423	BHE20_11		0	-82.0599	82.0599	82.0599		0	0	0	0										1	1	-1	-1
17_Isomer7_mon2_FmH2O10			MGCDB84_TAE140nonMR_41	BHE20_12		0	-704.099	704.099	704.099		0	0	0											1	-3	-4
17_Isomer7_mon3_FmH2O10			MGCDB84_TAE140nonMR_77	BHE20_13		0	-456.072	456.072	456.072		0	0	0	0										1	-2	-1	-2
17_Isomer7_mon4_FmH2O10			MGCDB84_TAE140nonMR_78	BHE20_14		0	-420.636	420.636	420.636		0	0	0	0										1	-1	-1	-2
17_Isomer7_mon5_FmH2O10			MGCDB84_TAE140nonMR_82	BHE20_15		0	-434.737	434.737	434.737		0	0	0	0	0									1	-1	-1	-1	-1
17_Isomer7_mon6_FmH2O10			MGCDB84_TAE140nonMR_100	BHE20_16		0	-205.89	205.89	205.89		0	0	0	0										1	-1	-1	-1
17_Isomer7_mon7_FmH2O10			GMTKN55_BH76_45	BHE20_17		0	6.3	-6.3	6.3		0	0	0											-1	-1	1
17_Isomer7_mon8_FmH2O10			GMTKN55_BH76_53	BHE20_18		0	3.5	-3.5	3.5		0	0	0											-1	-1	1
17_Isomer7_mon9_FmH2O10			GMTKN55_BH76_57	BHE20_19		0	14.4	-14.4	14.4		0	0	0											-1	-1	1
17_N_AE18			GMTKN55_SIE4x4_9	BHE20_20		0	35.9	-35.9	35.9		0	0	0											1	1	-1
17_p4o10_DC9			MN_SR-MGN-BE107_11	BHH16_1		0	181.37	-181.37	181.37		0	0	0											-1	1	2
170_f2o_W4-11			MN_MR-MGM-BE4_1	BHH16_2		0	96.1499	-96.1499	96.1499		0	0	0											-1	1	1
172_BzBz_T-4p4_monA_NBC10			MN_NHTBH38_10	BHH16_3		0	105.8	-105.8	105.8		0	0	0											-1	-1	1
173_fo2_W4-11			MN_NHTBH38_12	BHH16_4		0	59.16	-59.16	59.16		0	0	0											-1	-1	1
174_foof_W4-11			MN_pTC13_13	BHH16_5		0	240.963	-240.963	240.963		0	0												-1	1
178_BzBz_T-5p0_dim_NBC10			MN_HC7_6	BHH16_6		0	193.99	-193.99	193.99		0	0	0											-1	3	2
18_ArAr_4p9_RG10			MGCDB84_FmH2O10_7	BHH16_7		0	-169.92	169.92	169.92		0	0	0	0	0	0	0	0	0	0	0	0		1	-1	-1	-1	-1	-1	-1	-1	-1	-1	-1	-1
18_Cu2_SR-TM-BE17			MGCDB84_HAT707MR_120	BHH16_8		0	201.14	-201.14	201.14		0	0	0	0										1	1	-1	-1
18_O_AE18			MGCDB84_HAT707nonMR_308	BHH16_9		0	-72.2299	72.2299	72.2299		0	0	0	0										1	1	-1	-1
187_hco_W4-11			MGCDB84_HAT707nonMR_560	BHH16_10		0	-68.7099	68.7099	68.7099		0	0	0	0										1	1	-1	-1
19_C24CoronaD6h_C20C24			MGCDB84_TAE140nonMR_42	BHH16_11		0	-577.78	577.78	577.78		0	0	0											1	-1	-4
19_Cl-_SeF2_dim_Bauza30			MGCDB84_BSR36_15	BHH16_12		0	15.05	-15.05	15.05		0	0	0											7	-1	-6
19_Cl-_SeF2_monA_Bauza30			GMTKN55_BH76_65	BHH16_13		0	10.4	-10.4	10.4		0	0	0											-1	-1	1
19_Cl-_SeF2_monB_Bauza30			GMTKN55_DC13_4	BHH16_14		0	-18.8	18.8	18.8		0	0												-2	1
19_F_AE18			GMTKN55_G2RC_21	BHH16_15		0	-81.21	81.21	81.21		0	0	0	0										-1	-1	1	1
19_H2_Platonic24			GMTKN55_SIE4x4_3	BHH16_16		0	48.7	-48.7	48.7		0	0												1	-1
190_hf_W4-11			MGCDB84_AlkAtom19_17	AR5_1		0	-1892.95	1892.95	1892.95		0	0	0											1	-6	-14
192_hnco_W4-11			MGCDB84_PlatonicTAE6_3	AR5_2		0	1706.59	-1706.59	1706.59		0	0	0											-1	8	8
194_hno_W4-11			MGCDB84_PlatonicTAE6_5	AR5_3		0	2718.29	-2718.29	2718.29		0	0	0											-1	12	12
197_hof_W4-11			MGCDB84_PlatonicTAE6_6	AR5_4		0	4621.46	-4621.46	4621.46		0	0	0											-1	20	20
199_hoo_W4-11			MGCDB84_C20C24_8	AR5_5		0	84.5099	-84.5099	84.5099		0	0												1	-1
20_C24RingC12h_C20C24			MN_MR-MGM-BE4_3	NLME15_1		0	57.59	-57.59	57.59		0	0	0											-1	1	1
20_CH4_Platonic24			MN_IP23_14	NLME15_2		0	156.011	-156.011	156.011		0	0												-1	1
20_isomer10_H2O20Bind10			MN_AE17_6	NLME15_3		0	-23748.1	23748.1	23748.1		0													1
20_isomer10_mon1_H2O20Bind10			MGCDB84_G21IP_28	NLME15_4		0	243.709	-243.709	243.709		0	0												1	-1
20_Ne_AE18			MGCDB84_BDE99MR_4	NLME15_5		0	-60.94	60.94	60.94		0	0	0											1	-1	-1
20_Ni-nr_MR-TM-BE13			MGCDB84_BDE99MR_6	NLME15_6		0	-81.6499	81.6499	81.6499		0	0	0											1	-1	-1
203_methanol_W4-11			MGCDB84_BDE99MR_57	NLME15_7		0	-85.8699	85.8699	85.8699		0	0	0											1	-1	-1
21_26_G21IP			MGCDB84_HAT707nonMR_101	NLME15_8		0	2.68	-2.68	2.68		0	0	0	0										1	1	-1	-1
21_C2H6_Platonic24			MGCDB84_HAT707MR_350	NLME15_9		0	62.35	-62.35	62.35		0	0	0	0										1	1	-1	-1
21_H2O8s4_WATER27			MGCDB84_HAT707nonMR_648	NLME15_10		0	-36.2	36.2	36.2		0	0	0	0										1	1	-1	-1
21_Na_AE18			MGCDB84_TAE140nonMR_4	NLME15_11		0	-324.945	324.945	324.945		0	0	0											1	-1	-4
21_OH-_EA13			GMTKN55_DC13_2	NLME15_12		0	-7.7	7.7	7.7		0	0												-1	1
215_no_W4-11			GMTKN55_DIPCS10_9	NLME15_13		0	522.1	-522.1	522.1		0	0												-1	1
216_o2_W4-11			GMTKN55_G2RC_11	NLME15_14		0	-24.89	24.89	24.89		0	0	0	0										-1	-1	1	1
217_o3_W4-11			GMTKN55_W4-11_139	NLME15_15		0	105.239	-105.239	105.239		0	0	0											-1	1	1
218_oclo_W4-11			MN_MR-TM-BE13_12	NLMH7_1		0	87.8513	-87.8513	87.8513		0	0	0											-1	1	1
22_c2_MR-MGN-BE17			MGCDB84_TAE140nonMR_103	NLMH7_2		0	-312.649	312.649	312.649		0	0	0	0										1	-1	-1	-2
22_C4H10_Platonic24			MGCDB84_TAE140MR_132	NLMH7_3		0	-128.12	128.12	128.12		0	0	0											1	-2	-1
22_F2_NCCE30			MGCDB84_PlatonicTAE6_2	NLMH7_4		0	1254.32	-1254.32	1254.32		0	0	0											-1	6	6
22_Mg_AE18			GMTKN55_W4-11_114	NLMH7_5		0	270.849	-270.849	270.849		0	0	0											-1	2	1
22_NiCl-nr_MR-TM-BE13			GMTKN55_W4-11_115	NLMH7_6		0	233.089	-233.089	233.089		0	0	0											-1	1	3
22_OH_EA13			GMTKN55_W4-11_137	NLMH7_7		0	152.369	-152.369	152.369		0	0	0											-1	2	2
220_ocs_W4-11			MN_MR-MGN-BE17_15	NLMR11_1		0	146.88	-146.88	146.88		0	0												-1	2
221_of_W4-11			MN_MR-TMD-BE3_1	NLMR11_2		0	36.019	-36.019	36.019		0	0												-1	2
222_oh_W4-11			MN_MR-TMD-BE3_2	NLMR11_3		0	64.2004	-64.2004	64.2004		0	0												-1	2
223_oxirane_W4-11			MN_MR-TMD-BE3_3	NLMR11_4		0	26.59	-26.59	26.59		0	0												-1	2
224_oxirene_W4-11			MGCDB84_PlatonicIG6_4	NLMR11_5		0	365.2	-365.2	365.2		0	0	0											1	15	-10
23_Al_AE18			GMTKN55_MB16-43_5	NLMR11_6		0	147.683	-147.683	147.683		0	0	0	0	0	0	0							-2	-4	4	2	2	4	1
23_F3CNHBr_HNBrBDE18			GMTKN55_MB16-43_13	NLMR11_7		0	19.8751	-19.8751	19.8751		0	0	0	0	0	0	0							-2	-5	4	4	2	2	2
230_propene_W4-11			GMTKN55_MB16-43_20	NLMR11_8		0	242.805	-242.805	242.805		0	0	0	0	0	0	0							-2	-11	6	4	2	2	1
232_s2_W4-11			GMTKN55_MB16-43_28	NLMR11_9		0	325.121	-325.121	325.121		0	0	0	0	0	0								-2	4	2	1	1	2
233_s2o_W4-11			GMTKN55_MB16-43_38	NLMR11_10		0	98.1943	-98.1943	98.1943		0	0	0	0	0	0	0	0	0	0				-2	-12	2	2	2	1	2	4	1	1
234_s3_W4-11			GMTKN55_W4-11_131	NLMR11_11		0	147.023	-147.023	147.023		0	0												-1	2
235_s4-c2v_W4-11			MN_SR-TM-BE17_7	NLSIE9_1		0	45.4999	-45.4999	45.4999		0	0	0											-1	1	1
238_si_W4-11			MN_SR-MGN-BE107_12	NLSIE9_2		0	84.18	-84.18	84.18		0	0	0											-1	1	1
239_sif4_W4-11			MGCDB84_PlatonicHD6_5	NLSIE9_3		0	98.9299	-98.9299	98.9299		0	0	0											1	18	-12
24_F3CNHrad_HNBrBDE18			MGCDB84_PlatonicHD6_6	NLSIE9_4		0	73.8999	-73.8999	73.8999		0	0	0											1	30	-20
24_h15_BSR36			GMTKN55_BSR36_36	NLSIE9_5		0	45.46	-45.46	45.46		0	0	0											18	-1	-22
24_H2O-F_TA13			GMTKN55_MB16-43_9	NLSIE9_6		0	381.43	-381.43	381.43		0	0	0	0	0	0	0	0						-2	-6	2	4	2	1	2	1
24_Si_AE18			GMTKN55_MB16-43_25	NLSIE9_7		0	322.49	-322.49	322.49		0	0	0	0	0	0	0							-1	-5	2	1	1	1	2
242_sih4_W4-11			GMTKN55_SIE4x4_6	NLSIE9_8		0	46.9	-46.9	46.9		0	0	0											1	1	-1
244_sio_W4-11			GMTKN55_SIE4x4_15	NLSIE9_9		0	16.9	-16.9	16.9		0	0	0											1	1	-1
245_so2_W4-11			GMTKN55_ISOL24_4	MBMH8_1		0	69.03	-69.03	69.03		0	0												-1	1
246_so3_W4-11			GMTKN55_MB16-43_7	MBMH8_2		0	557.984	-557.984	557.984		0	0	0	0	0	0	0	0	0	0				-2	-7	2	4	1	1	2	2	1	1
247_so_W4-11			GMTKN55_MB16-43_12	MBMH8_3		0	453.065	-453.065	453.065		0	0	0	0	0	0	0	0	0	0				-2	-11	4	2	2	1	1	4	1	1
25_P_AE18			GMTKN55_MB16-43_17	MBMH8_4		0	653.593	-653.593	653.593		0	0	0	0	0	0	0	0						-2	-9	4	2	1	3	2	2
250_t-hono_W4-11			GMTKN55_MB16-43_18	MBMH8_5		0	580.861	-580.861	580.861		0	0	0	0	0	0	0	0						-2	-4	6	1	1	1	2	1
251_t-hooo_W4-11			GMTKN55_MB16-43_19	MBMH8_6		0	664.56	-664.56	664.56		0	0	0	0	0	0	0	0	0					-2	-7	2	4	1	1	4	2	1
26_Isomer16_Styrene45			GMTKN55_MB16-43_41	MBMH8_7		0	160.291	-160.291	160.291		0	0	0	0	0	0	0	0						-2	-16	4	6	1	2	2	2
26_S_AE18			GMTKN55_MB16-43_43	MBMH8_8		0	421.968	-421.968	421.968		0	0	0	0	0	0	0	0						-2	-7	2	3	1	1	2	4
266_PyPy_T3-4p1_dim_NBC10			MGCDB84_PlatonicIG6_6	MBH5_1		0	501.85	-501.85	501.85		0	0	0											1	30	-20
266_PyPy_T3-4p1_monA_NBC10			GMTKN55_MB16-43_4	MBH5_2		0	356.848	-356.848	356.848		0	0	0	0	0	0	0	0						-2	-17	6	2	1	1	2	4
27_3methylpentane_Alk44			GMTKN55_MB16-43_15	MBH5_3		0	216.096	-216.096	216.096		0	0	0	0	0	0	0	0	0					-2	-15	4	2	2	2	4	1	1
27_Cl_AE18			GMTKN55_MB16-43_16	MBH5_4		0	326.757	-326.757	326.757		0	0	0	0	0	0	0	0						-2	-19	2	6	1	4	2	4
27_Cr_IP23			GMTKN55_MB16-43_40	MBH5_5		0	-362.981	362.981	362.981		0	0	0	0	0	0	0							-2	-26	6	6	1	2	4
27_H2S-HCl_NCCE30			MN_DC9_6	MBVH7_1		0	719.7	-719.7	719.7		0	0	0											-1	1	5
2733_05MeOHMeOH100_dim_S66x8			GMTKN55_MB16-43_1	MBVH7_2		0	869.597	-869.597	869.597		0	0	0	0	0	0	0	0	0					-2	-4	4	2	2	1	2	2	1
2733_05MeOHMeOH100_monA_S66x8			GMTKN55_MB16-43_2	MBVH7_3		0	737.786	-737.786	737.786		0	0	0	0	0	0	0	0	0					-2	-6	2	4	1	1	2	2	2
28_Ar_AE18			GMTKN55_MB16-43_3	MBVH7_4		0	518.658	-518.658	518.658		0	0	0	0	0	0	0	0	0	0				-2	-13	2	6	1	1	2	2	2	1
28_Cr+_IP23			GMTKN55_MB16-43_24	MBVH7_5		0	1070.64	-1070.64	1070.64		0	0	0	0	0	0	0	0						-2	-8	2	1	4	2	4	1
28_H2S_NCCE30			GMTKN55_MB16-43_34	MBVH7_6		0	538.264	-538.264	538.264		0	0	0	0	0	0	0	0	0	0	0			-2	-10	2	2	1	2	1	2	2	2	1
28_H3OpH2O6OHm_WATER27			GMTKN55_MB16-43_37	MBVH7_7		0	629.784	-629.784	629.784		0	0	0	0	0	0	0	0	0					-2	-19	8	2	2	1	2	2	2
28_V_MR-TM-BE13			MGCDB84_AE18_1	AE18pE_1		0	-313.755	313.755	313.755	The Calc-Ref error is weighted by the number of electrons	0													1
2805_14PeptideMeNH2100_monA_S66x8			MGCDB84_AE18_2	AE18pE_2		0	-1822.11	911.055	911.055		0													1
2805_14PeptideMeNH2100_monB_S66x8			MGCDB84_AE18_3	AE18pE_3		0	-4692.55	1564.18	1564.18		0													1
2806_14PeptideMeNH2105_dim_S66x8			MGCDB84_AE18_4	AE18pE_4		0	-9203.9	2300.98	2300.98		0													1
284_Leucine_xap_YMPJ519			MGCDB84_AE18_5	AE18pE_5		0	-15470.6	3094.11	3094.11		0													1
293_Leucine_xay_YMPJ519			MGCDB84_AE18_6	AE18pE_6		0	-23748.1	3958.01	3958.01		0													1
3_6_0-1_SW49			MGCDB84_AE18_7	AE18pE_7		0	-34255.2	4893.6	4893.6		0													1
30_VO-nr_MR-TM-BE13			MGCDB84_AE18_8	AE18pE_8		0	-47105.4	5888.18	5888.18		0													1
31_PMe3_NBPRC			MGCDB84_AE18_9	AE18pE_9		0	-62583.9	6953.77	6953.77		0													1
32_co_BH76			MGCDB84_AE18_10	AE18pE_10		0	-80909.5	8090.95	8090.95		0													1
34_f2_BH76			MGCDB84_AE18_11	AE18pE_11		0	-101816	9256.02	9256.02		0													1
37_HCl_NCCE30			MGCDB84_AE18_12	AE18pE_12		0	-125535	10461.3	10461.3		0													1
39_Ru_IP23			MGCDB84_AE18_13	AE18pE_13		0	-152074	11698	11698		0													1
40_Ru+_IP23			MGCDB84_AE18_14	AE18pE_14		0	-181575	12969.7	12969.7		0													1
4138_26UracilUracilpipi_dim_S66			MGCDB84_AE18_15	AE18pE_15		0	-214143	14276.2	14276.2		0													1
4138_26UracilUracilpipi_monA_S66			MGCDB84_AE18_16	AE18pE_16		0	-249818	15613.6	15613.6		0													1
4190_water5FRB_Shields38			MGCDB84_AE18_17	AE18pE_17		0	-288747	16985.1	16985.1		0													1
42_NH3-F2_NCCE30			MGCDB84_AE18_18	AE18pE_18		0	-331036	18390.9	18390.9		0													1
4217_waterC2v_Shields38
43_Arginine_xaw_YMPJ519
45_NH3_NCCE30
46_IP_61_G21IP
46_r7_BSR36
47_Br_HNBrBDE18
475_Tryptophane_xae_YMPJ519
485_Tryptophane_xao_YMPJ519
49_hcnts_BH76
5_10_0-1_SW49
50_hco_BH76
52_hf2ts_BH76
56_IP_72_G21IP
60_hnc_BH76
81_Arginine_xci_YMPJ519
92_Pyrazinedimer_dim_S22
92_Pyrazinedimer_monB_S22
ADIM6_AD6
ADIM6_AM6
ALKBDE10_bef
Amino20x4_PRO_xac
Amino20x4_PRO_xae
Amino20x4_VAL_xad
Amino20x4_VAL_xak
BH76_C2H6
BH76_CH4
BH76_H2O
BH76_hcl
BH76_NH2
BH76_NH3
BH76_oh
BH76_RKT04
BH76_RKT09
BH76_RKT11
BH76_RKT17
BSR36_c2h6
BSR36_c5
BSR36_ch4
BSR36_r8
CH2CHCHCH2CH3_ABDE13
CH3_ABDE13
DARC_butadiene
DARC_ethine
DARC_P2
DC13_c20bowl
DC13_c20cage
DC13_omcb
DC13_tmethen
DIPCS10_mg_2+
FH51_1-hexene
FH51_H2
FH51_hexyne
G21EA_EA_10
G21EA_EA_10n
G21EA_EA_13
G21EA_EA_13n
G2RC_1
G2RC_13
G2RC_18
G2RC_34
G2RC_47
G2RC_61
G2RC_62
G2RC_66
G2RC_67
G2RC_68
h2o_SW49
hexene_ABDE13
ISOL24_i17e
ISOL24_i17p
ISOL24_i1e
ISOL24_i1p
ISOL24_i4e
ISOL24_i4p
MB16-43_01
MB16-43_02
MB16-43_03
MB16-43_04
MB16-43_05
MB16-43_07
MB16-43_09
MB16-43_12
MB16-43_13
MB16-43_15
MB16-43_16
MB16-43_17
MB16-43_18
MB16-43_19
MB16-43_20
MB16-43_24
MB16-43_25
MB16-43_28
MB16-43_34
MB16-43_37
MB16-43_38
MB16-43_40
MB16-43_41
MB16-43_43
MB16-43_AlH3
MB16-43_BH3
MB16-43_CH4
MB16-43_Cl2
MB16-43_F2
MB16-43_H2
MB16-43_LiH
MB16-43_MgH2
MB16-43_N2
MB16-43_NaH
MB16-43_O2
MB16-43_P2
MB16-43_S2
MB16-43_SiH4
MN_20_ch3f_BH76
MN_21_ch3fclts_BH76
MN_42_H2_BH76
MN_52_hf2ts_BH76
MN_55_hf_lower_BH76
MN_75_OH_upper_BH76
MN_79_RKT02_BH76
PA26_si2h6
PA26_si2h6p
PCONF21_GLY_ab
PCONF21_GLY_aR
PNICO23_13
PNICO23_13a
RG18_kr
RG18_kr3
SIE4x4_h2+_1_5
SIE4x4_h2o
SIE4x4_h2o+
SIE4x4_h2o2+_1_5
SIE4x4_he+
SIE4x4_he2+_1_25
SIE4x4_nh3
SIE4x4_nh3+
SIE4x4_nh32+_1_0
W4-11_bhf2
W4-11_bn
W4-11_c-hooo
W4-11_c2
W4-11_ch2-trip
W4-11_ch4
W4-11_foof
W4-11_n2o
WATER27_H2O
WATER27_H2O20es
WATER27_H3Op
WATER27_H3OpH2O62d
WCPT18_reac2
WCPT18_ts2

## Sheet: EstimatedMUEs
ASCDB - A Smaller Chemistry DataBase			Copy and paste the MUEs from the previous sheet (J17:J216) and paste them in column C. INDEX-MATCH will deliver the results in cells B5-B7.
All values are in kcal/mol.
Name of database	eMUE
MGCDB84	0.42
GMTKN55	0.74
Minnesota 2015B	2.4
	Paste J16:J216 below ↓				MGCDB84					GMTKN55					Minnesota 2015B
Data-point main DB	Data-point ASCDB	|e| (kcal/mol)			Datapoint	Coefficient	MUE value	Intercept		Datapoint	Coefficient	MUE value	Intercept		Data-point	Coefficient	MUE value	Intercept
MN_NCCE30_16	NCE15_1				MGCDB84_AE18_7	0.0022507	0	0.415959		GMTKN55_BH76_45	0.0148906	0	0.736461		MN_SR-MGN-BE107_11	0.0055525	0	2.3968
MN_PA8_2	NCE15_2				MGCDB84_AlkAtom19_17	0.0081029	0			GMTKN55_DC13_2	0.0122999	0			MN_SR-MGN-BE107_43	0.163709	0
MGCDB84_Butanediol65_5	NCE15_3				MGCDB84_Bauza30_9	0.0385295	0	eMUE		GMTKN55_DC13_4	0.0227417	0	eMUE		MN_SR-MGN-BE107_76	0.0985072	0	eMUE
MGCDB84_NHTBH38_38	NCE15_4				MGCDB84_BH76RC_10	0.0340625	0	0.415959		GMTKN55_ISOL24_4	0.0069133	0	0.736461		MN_ABDE13_6	0.111929	0	2.3968
MGCDB84_RG10_268	NCE15_5				MGCDB84_BSR36_22	0.0246638	0			GMTKN55_MB16-43_13	0.0043958	0			MN_MR-MGN-BE17_7	0.208952	0
MGCDB84_RG10_457	NCE15_6				MGCDB84_FmH2O10_7	0.0105061	0			GMTKN55_MB16-43_2	0.0148394	0			MN_SR-TM-BE17_9	0.0111902	0
MGCDB84_S66x8_35	NCE15_7				MGCDB84_G21IP_28	0.0033971	0			GMTKN55_MB16-43_28	0.0026937	0			MN_MR-TM-BE13_12	0.0028237	0
MGCDB84_YMPJ519_33	NCE15_8				MGCDB84_HAT707MR_484	0.0064691	0			GMTKN55_MB16-43_38	0.0054141	0			MN_MR-TMD-BE3_1	0.0044447	0
MGCDB84_YMPJ519_122	NCE15_9				MGCDB84_HAT707nonMR_194	0.0042939	0			GMTKN55_MB16-43_40	0.0019886	0			MN_MR-TMD-BE3_3	0.0038915	0
MGCDB84_YMPJ519_283	NCE15_10				MGCDB84_HAT707nonMR_219	0.0116288	0			GMTKN55_MB16-43_5	0.0030353	0			MN_HC7_6	0.0089449	0
MGCDB84_YMPJ519_465	NCE15_11				MGCDB84_HAT707nonMR_302	0.0041668	0			GMTKN55_PCONF21_11	0.0573541	0			MN_AE17_6	0.0762471	0
GMTKN55_Amino20x4_58	NCE15_12				MGCDB84_HAT707nonMR_466	0.0144524	0			GMTKN55_W4-11_11	0.0169214	0			MN_DC9_6	0.0052714	0
GMTKN55_Amino20x4_80	NCE15_13				MGCDB84_PlatonicHD6_5	0.0040497	0			GMTKN55_W4-11_114	0.0217445	0
GMTKN55_BH76RC_18	NCE15_14				MGCDB84_PlatonicIG6_4	0.0024323	0			GMTKN55_W4-11_115	0.0002151	0
GMTKN55_PNICO23_13	NCE15_15				MGCDB84_S66x8_108	0.231075	0			GMTKN55_W4-11_139	0.0101862	0
MN_SR-MGN-BE107_76	NCH21_1				MGCDB84_S66x8_35	0.170466	0			GMTKN55_W4-11_34	0.0299297	0
MN_NCCE30_8	NCH21_2				MGCDB84_TA13_6	0.0235536	0			GMTKN55_W4-11_7	0.0755413	0
MN_4pIsoE4_3	NCH21_3				MGCDB84_TAE140MR_132	0.0082053	0			GMTKN55_WATER27_14	0.0048557	0
MGCDB84_Bauza30_9	NCH21_4				MGCDB84_TAE140nonMR_120	0.0188418	0			GMTKN55_WATER27_19	0.0186607	0
MGCDB84_G21IP_18	NCH21_5				MGCDB84_TAE140nonMR_4	0.0057926	0			GMTKN55_WCPT18_2	0.118388	0
MGCDB84_NBC10_78	NCH21_6				MGCDB84_TAE140nonMR_78	0.0122523	0
MGCDB84_S66x8_108	NCH21_7				MGCDB84_WATER27_23	0.0050195	0
MGCDB84_Styrene45_16	NCH21_8
MGCDB84_BDE99nonMR_95	NCH21_9
MGCDB84_HAT707nonMR_194	NCH21_10
MGCDB84_HAT707nonMR_472	NCH21_11
MGCDB84_HAT707MR_349	NCH21_12
MGCDB84_ISOMERIZATION20_18	NCH21_13
MGCDB84_3B-69-DIM_109	NCH21_14
GMTKN55_ALKBDE10_1	NCH21_15
GMTKN55_FH51_12	NCH21_16
GMTKN55_G21EA_10	NCH21_17
GMTKN55_PA26_20	NCH21_18
GMTKN55_RG18_6	NCH21_19
GMTKN55_W4-11_7	NCH21_20
GMTKN55_WCPT18_2	NCH21_21
MGCDB84_NBPRC_11	NCC21_1
MGCDB84_BH76RC_10	NCC21_2
MGCDB84_NBC10_166	NCC21_3
MGCDB84_S22_15	NCC21_4
MGCDB84_S66_26	NCC21_5
MGCDB84_Shields38_12	NCC21_6
MGCDB84_SW49Bind345_31	NCC21_7
MGCDB84_BDE99nonMR_75	NCC21_8
MGCDB84_3B-69-TRIM_27	NCC21_9
MGCDB84_3B-69-TRIM_47	NCC21_10
MGCDB84_H2O16Rel5_2	NCC21_11
MGCDB84_BSR36_22	NCC21_12
MGCDB84_HNBrBDE18_7	NCC21_13
GMTKN55_ADIM6_5	NCC21_14
GMTKN55_BSR36_23	NCC21_15
GMTKN55_DARC_2	NCC21_16
GMTKN55_ISOL24_17	NCC21_17
GMTKN55_PCONF21_11	NCC21_18
GMTKN55_WATER27_19	NCC21_19
MN_MR-TM-BE13_13	NCC21_20
MN_IP23_20	NCC21_21
MGCDB84_H2O20Bind4_2	NCW3_1
MGCDB84_H2O20Bind10_10	NCW3_2
GMTKN55_WATER27_14	NCW3_3
MN_SR-TM-BE17_1	ARE19_1
MN_SR-TM-BE17_9	ARE19_2
MN_4dAEE5_4	ARE19_3
MGCDB84_EA13_6	ARE19_4
MGCDB84_HAT707nonMR_64	ARE19_5
MGCDB84_HAT707nonMR_227	ARE19_6
MGCDB84_HAT707MR_265	ARE19_7
MGCDB84_HAT707nonMR_302	ARE19_8
MGCDB84_HAT707nonMR_466	ARE19_9
MGCDB84_HAT707MR_484	ARE19_10
MGCDB84_HAT707MR_513	ARE19_11
MGCDB84_TAE140nonMR_11	ARE19_12
MGCDB84_TAE140nonMR_36	ARE19_13
MGCDB84_TAE140nonMR_120	ARE19_14
GMTKN55_G21EA_13	ARE19_15
GMTKN55_G2RC_14	ARE19_16
GMTKN55_ISOL24_1	ARE19_17
GMTKN55_W4-11_11	ARE19_18
GMTKN55_W4-11_34	ARE19_19
MN_SR-MGN-BE107_43	BHE20_1
MN_ABDE13_6	BHE20_2
MN_MR-MGN-BE17_7	BHE20_3
MN_HTBH38_3	BHE20_4
MGCDB84_WATER27_23	BHE20_5
MGCDB84_NHTBH38_9	BHE20_6
MGCDB84_IP13_2	BHE20_7
MGCDB84_TA13_6	BHE20_8
MGCDB84_HAT707nonMR_219	BHE20_9
MGCDB84_HAT707nonMR_409	BHE20_10
MGCDB84_HAT707nonMR_423	BHE20_11
MGCDB84_TAE140nonMR_41	BHE20_12
MGCDB84_TAE140nonMR_77	BHE20_13
MGCDB84_TAE140nonMR_78	BHE20_14
MGCDB84_TAE140nonMR_82	BHE20_15
MGCDB84_TAE140nonMR_100	BHE20_16
GMTKN55_BH76_45	BHE20_17
GMTKN55_BH76_53	BHE20_18
GMTKN55_BH76_57	BHE20_19
GMTKN55_SIE4x4_9	BHE20_20
MN_SR-MGN-BE107_11	BHH16_1
MN_MR-MGM-BE4_1	BHH16_2
MN_NHTBH38_10	BHH16_3
MN_NHTBH38_12	BHH16_4
MN_pTC13_13	BHH16_5
MN_HC7_6	BHH16_6
MGCDB84_FmH2O10_7	BHH16_7
MGCDB84_HAT707MR_120	BHH16_8
MGCDB84_HAT707nonMR_308	BHH16_9
MGCDB84_HAT707nonMR_560	BHH16_10
MGCDB84_TAE140nonMR_42	BHH16_11
MGCDB84_BSR36_15	BHH16_12
GMTKN55_BH76_65	BHH16_13
GMTKN55_DC13_4	BHH16_14
GMTKN55_G2RC_21	BHH16_15
GMTKN55_SIE4x4_3	BHH16_16
MGCDB84_AlkAtom19_17	AR5_1
MGCDB84_PlatonicTAE6_3	AR5_2
MGCDB84_PlatonicTAE6_5	AR5_3
MGCDB84_PlatonicTAE6_6	AR5_4
MGCDB84_C20C24_8	AR5_5
MN_MR-MGM-BE4_3	NLME15_1
MN_IP23_14	NLME15_2
MN_AE17_6	NLME15_3
MGCDB84_G21IP_28	NLME15_4
MGCDB84_BDE99MR_4	NLME15_5
MGCDB84_BDE99MR_6	NLME15_6
MGCDB84_BDE99MR_57	NLME15_7
MGCDB84_HAT707nonMR_101	NLME15_8
MGCDB84_HAT707MR_350	NLME15_9
MGCDB84_HAT707nonMR_648	NLME15_10
MGCDB84_TAE140nonMR_4	NLME15_11
GMTKN55_DC13_2	NLME15_12
GMTKN55_DIPCS10_9	NLME15_13
GMTKN55_G2RC_11	NLME15_14
GMTKN55_W4-11_139	NLME15_15
MN_MR-TM-BE13_12	NLMH7_1
MGCDB84_TAE140nonMR_103	NLMH7_2
MGCDB84_TAE140MR_132	NLMH7_3
MGCDB84_PlatonicTAE6_2	NLMH7_4
GMTKN55_W4-11_114	NLMH7_5
GMTKN55_W4-11_115	NLMH7_6
GMTKN55_W4-11_137	NLMH7_7
MN_MR-MGN-BE17_15	NLMR11_1
MN_MR-TMD-BE3_1	NLMR11_2
MN_MR-TMD-BE3_2	NLMR11_3
MN_MR-TMD-BE3_3	NLMR11_4
MGCDB84_PlatonicIG6_4	NLMR11_5
GMTKN55_MB16-43_5	NLMR11_6
GMTKN55_MB16-43_13	NLMR11_7
GMTKN55_MB16-43_20	NLMR11_8
GMTKN55_MB16-43_28	NLMR11_9
GMTKN55_MB16-43_38	NLMR11_10
GMTKN55_W4-11_131	NLMR11_11
MN_SR-TM-BE17_7	NLSIE9_1
MN_SR-MGN-BE107_12	NLSIE9_2
MGCDB84_PlatonicHD6_5	NLSIE9_3
MGCDB84_PlatonicHD6_6	NLSIE9_4
GMTKN55_BSR36_36	NLSIE9_5
GMTKN55_MB16-43_9	NLSIE9_6
GMTKN55_MB16-43_25	NLSIE9_7
GMTKN55_SIE4x4_6	NLSIE9_8
GMTKN55_SIE4x4_15	NLSIE9_9
GMTKN55_ISOL24_4	MBMH8_1
GMTKN55_MB16-43_7	MBMH8_2
GMTKN55_MB16-43_12	MBMH8_3
GMTKN55_MB16-43_17	MBMH8_4
GMTKN55_MB16-43_18	MBMH8_5
GMTKN55_MB16-43_19	MBMH8_6
GMTKN55_MB16-43_41	MBMH8_7
GMTKN55_MB16-43_43	MBMH8_8
MGCDB84_PlatonicIG6_6	MBH5_1
GMTKN55_MB16-43_4	MBH5_2
GMTKN55_MB16-43_15	MBH5_3
GMTKN55_MB16-43_16	MBH5_4
GMTKN55_MB16-43_40	MBH5_5
MN_DC9_6	MBVH7_1
GMTKN55_MB16-43_1	MBVH7_2
GMTKN55_MB16-43_2	MBVH7_3
GMTKN55_MB16-43_3	MBVH7_4
GMTKN55_MB16-43_24	MBVH7_5
GMTKN55_MB16-43_34	MBVH7_6
GMTKN55_MB16-43_37	MBVH7_7
MGCDB84_AE18_1	AE18pE_1
MGCDB84_AE18_2	AE18pE_2
MGCDB84_AE18_3	AE18pE_3
MGCDB84_AE18_4	AE18pE_4
MGCDB84_AE18_5	AE18pE_5
MGCDB84_AE18_6	AE18pE_6
MGCDB84_AE18_7	AE18pE_7
MGCDB84_AE18_8	AE18pE_8
MGCDB84_AE18_9	AE18pE_9
MGCDB84_AE18_10	AE18pE_10
MGCDB84_AE18_11	AE18pE_11
MGCDB84_AE18_12	AE18pE_12
MGCDB84_AE18_13	AE18pE_13
MGCDB84_AE18_14	AE18pE_14
MGCDB84_AE18_15	AE18pE_15
MGCDB84_AE18_16	AE18pE_16
MGCDB84_AE18_17	AE18pE_17
MGCDB84_AE18_18	AE18pE_18

## Sheet: EstimatedRMSEs
ASCDB - A Smaller Chemistry DataBase			Copy and paste the MUEs from the previous sheet (J17:J216) and paste them in column C. INDEX-MATCH will deliver the results in cells B5-B8 AND G5-G8.
All values are in kcal/mol.
Name of groups in MGCDB84	eRMSE				Name of groups in MGCDB84	eRMSE
Non-Covalent Easy (NCE)	0.19				Isomerization Difficult (ID)	1.96
Non-Covalent Easy Cluster (NCEC)	0.21				ThermoChemistry Easy (TCE)	1.7
Non-Covalent Difficult	0.61				ThermoChemistry Difficult (TCD)	1.96
Isomerization Easy (IE)	0.07				Barrier Heights	0.86
	Paste J16:J216 below ↓			MGCDB84
Data-point main DB	Data-point ASCDB	|e| (kcal/mol)		Subset	Datapoint	Coefficient	MUE value	Intercept	eRMSE
MN_NCCE30_16	NCE15_1			NCED	MGCDB84_NBC10_78	-0.195871	0	0.185421	0.185421
MN_PA8_2	NCE15_2				MGCDB84_S22_15	0.288681	0
MGCDB84_Butanediol65_5	NCE15_3				MGCDB84_S66x8_35	0.134704	0
MGCDB84_NHTBH38_38	NCE15_4				MGCDB84_S66x8_108	0.442021	0
MGCDB84_RG10_268	NCE15_5				MGCDB84_3B-69-DIM_109	0.0553564	0
MGCDB84_RG10_457	NCE15_6			NCEC	MGCDB84_3B-69-TRIM_27	0.31973	0	0.214538	0.214538
MGCDB84_S66x8_35	NCE15_7				MGCDB84_3B-69-TRIM_47	0.0879081	0
MGCDB84_YMPJ519_33	NCE15_8				MGCDB84_FmH2O10_7	0.0754265	0
MGCDB84_YMPJ519_122	NCE15_9				MGCDB84_H2O20Bind4_2	0.0411903	0
MGCDB84_YMPJ519_283	NCE15_10				MGCDB84_H2O20Bind10_10	0.0962495	0
MGCDB84_YMPJ519_465	NCE15_11				MGCDB84_Shields38_12	0.537657	0
GMTKN55_Amino20x4_58	NCE15_12				MGCDB84_SW49Bind345_31	-0.082606	0
GMTKN55_Amino20x4_80	NCE15_13				MGCDB84_WATER27_23	0.0508039	0
GMTKN55_BH76RC_18	NCE15_14			NCD	MGCDB84_Bauza30_9	0.286749	0	0.611707	0.611707
GMTKN55_PNICO23_13	NCE15_15				MGCDB84_TA13_6	0.132597	0
MN_SR-MGN-BE107_76	NCH21_1			IE	MGCDB84_Butanediol65_5	0.199259	0	0.0651619	0.0651619
MN_NCCE30_8	NCH21_2				MGCDB84_H2O16Rel5_2	0.11945	0
MN_4pIsoE4_3	NCH21_3				MGCDB84_YMPJ519_122	1.04943	0
MGCDB84_Bauza30_9	NCH21_4				MGCDB84_YMPJ519_465	0.494695	0
MGCDB84_G21IP_18	NCH21_5			ID	MGCDB84_C20C24_8	0.0944638	0	1.95639	1.95639
MGCDB84_NBC10_78	NCH21_6				MGCDB84_ISOMERIZATION20_18	0.303692	0
MGCDB84_S66x8_108	NCH21_7				MGCDB84_Styrene45_16	-0.258186	0
MGCDB84_Styrene45_16	NCH21_8			TCE	MGCDB84_AlkAtom19_17	0.073346	0	1.70317	1.70317
MGCDB84_BDE99nonMR_95	NCH21_9				MGCDB84_IP13_2	0.0742135	0
MGCDB84_HAT707nonMR_194	NCH21_10				MGCDB84_BDE99nonMR_75	0.125481	0
MGCDB84_HAT707nonMR_472	NCH21_11				MGCDB84_HAT707nonMR_194	0.144971	0
MGCDB84_HAT707MR_349	NCH21_12				MGCDB84_TAE140nonMR_4	0.0636813	0
MGCDB84_ISOMERIZATION20_18	NCH21_13				MGCDB84_TAE140nonMR_36	0.128497	0
MGCDB84_3B-69-DIM_109	NCH21_14				MGCDB84_TAE140nonMR_41	0.0404557	0
GMTKN55_ALKBDE10_1	NCH21_15				MGCDB84_TAE140nonMR_77	0.009994	0
GMTKN55_FH51_12	NCH21_16				MGCDB84_TAE140nonMR_78	0.0773947	0
GMTKN55_G21EA_10	NCH21_17				MGCDB84_TAE140nonMR_100	0.0105573	0
GMTKN55_PA26_20	NCH21_18				MGCDB84_TAE140nonMR_120	0.0278387	0
GMTKN55_RG18_6	NCH21_19				MGCDB84_BSR36_15	0.0213203	0
GMTKN55_W4-11_7	NCH21_20			TCD	MGCDB84_PlatonicTAE6_2	0.0657511	0	1.96101	1.96101
GMTKN55_WCPT18_2	NCH21_21				MGCDB84_PlatonicTAE6_5	-0.032466	0
MGCDB84_NBPRC_11	NCC21_1				MGCDB84_PlatonicTAE6_6	0.0674866	0
MGCDB84_BH76RC_10	NCC21_2				MGCDB84_PlatonicIG6_4	0.0418479	0
MGCDB84_NBC10_166	NCC21_3				MGCDB84_PlatonicIG6_6	0.0234373	0
MGCDB84_S22_15	NCC21_4				MGCDB84_PlatonicHD6_6	0.0497696	0
MGCDB84_S66_26	NCC21_5				MGCDB84_BDE99MR_4	0.129181	0
MGCDB84_Shields38_12	NCC21_6				MGCDB84_HAT707MR_349	-0.213672	0
MGCDB84_SW49Bind345_31	NCC21_7				MGCDB84_HAT707MR_513	0.109805	0
MGCDB84_BDE99nonMR_75	NCC21_8				MGCDB84_TAE140MR_132	0.109082	0
MGCDB84_3B-69-TRIM_27	NCC21_9			BH	MGCDB84_NHTBH38_9	0.552582	0	0.861731	0.861731
MGCDB84_3B-69-TRIM_47	NCC21_10				MGCDB84_NHTBH38_38	1.12073	0
MGCDB84_H2O16Rel5_2	NCC21_11
MGCDB84_BSR36_22	NCC21_12
MGCDB84_HNBrBDE18_7	NCC21_13
GMTKN55_ADIM6_5	NCC21_14
GMTKN55_BSR36_23	NCC21_15
GMTKN55_DARC_2	NCC21_16
GMTKN55_ISOL24_17	NCC21_17
GMTKN55_PCONF21_11	NCC21_18
GMTKN55_WATER27_19	NCC21_19
MN_MR-TM-BE13_13	NCC21_20
MN_IP23_20	NCC21_21
MGCDB84_H2O20Bind4_2	NCW3_1
MGCDB84_H2O20Bind10_10	NCW3_2
GMTKN55_WATER27_14	NCW3_3
MN_SR-TM-BE17_1	ARE19_1
MN_SR-TM-BE17_9	ARE19_2
MN_4dAEE5_4	ARE19_3
MGCDB84_EA13_6	ARE19_4
MGCDB84_HAT707nonMR_64	ARE19_5
MGCDB84_HAT707nonMR_227	ARE19_6
MGCDB84_HAT707MR_265	ARE19_7
MGCDB84_HAT707nonMR_302	ARE19_8
MGCDB84_HAT707nonMR_466	ARE19_9
MGCDB84_HAT707MR_484	ARE19_10
MGCDB84_HAT707MR_513	ARE19_11
MGCDB84_TAE140nonMR_11	ARE19_12
MGCDB84_TAE140nonMR_36	ARE19_13
MGCDB84_TAE140nonMR_120	ARE19_14
GMTKN55_G21EA_13	ARE19_15
GMTKN55_G2RC_14	ARE19_16
GMTKN55_ISOL24_1	ARE19_17
GMTKN55_W4-11_11	ARE19_18
GMTKN55_W4-11_34	ARE19_19
MN_SR-MGN-BE107_43	BHE20_1
MN_ABDE13_6	BHE20_2
MN_MR-MGN-BE17_7	BHE20_3
MN_HTBH38_3	BHE20_4
MGCDB84_WATER27_23	BHE20_5
MGCDB84_NHTBH38_9	BHE20_6
MGCDB84_IP13_2	BHE20_7
MGCDB84_TA13_6	BHE20_8
MGCDB84_HAT707nonMR_219	BHE20_9
MGCDB84_HAT707nonMR_409	BHE20_10
MGCDB84_HAT707nonMR_423	BHE20_11
MGCDB84_TAE140nonMR_41	BHE20_12
MGCDB84_TAE140nonMR_77	BHE20_13
MGCDB84_TAE140nonMR_78	BHE20_14
MGCDB84_TAE140nonMR_82	BHE20_15
MGCDB84_TAE140nonMR_100	BHE20_16
GMTKN55_BH76_45	BHE20_17
GMTKN55_BH76_53	BHE20_18
GMTKN55_BH76_57	BHE20_19
GMTKN55_SIE4x4_9	BHE20_20
MN_SR-MGN-BE107_11	BHH16_1
MN_MR-MGM-BE4_1	BHH16_2
MN_NHTBH38_10	BHH16_3
MN_NHTBH38_12	BHH16_4
MN_pTC13_13	BHH16_5
MN_HC7_6	BHH16_6
MGCDB84_FmH2O10_7	BHH16_7
MGCDB84_HAT707MR_120	BHH16_8
MGCDB84_HAT707nonMR_308	BHH16_9
MGCDB84_HAT707nonMR_560	BHH16_10
MGCDB84_TAE140nonMR_42	BHH16_11
MGCDB84_BSR36_15	BHH16_12
GMTKN55_BH76_65	BHH16_13
GMTKN55_DC13_4	BHH16_14
GMTKN55_G2RC_21	BHH16_15
GMTKN55_SIE4x4_3	BHH16_16
MGCDB84_AlkAtom19_17	AR5_1
MGCDB84_PlatonicTAE6_3	AR5_2
MGCDB84_PlatonicTAE6_5	AR5_3
MGCDB84_PlatonicTAE6_6	AR5_4
MGCDB84_C20C24_8	AR5_5
MN_MR-MGM-BE4_3	NLME15_1
MN_IP23_14	NLME15_2
MN_AE17_6	NLME15_3
MGCDB84_G21IP_28	NLME15_4
MGCDB84_BDE99MR_4	NLME15_5
MGCDB84_BDE99MR_6	NLME15_6
MGCDB84_BDE99MR_57	NLME15_7
MGCDB84_HAT707nonMR_101	NLME15_8
MGCDB84_HAT707MR_350	NLME15_9
MGCDB84_HAT707nonMR_648	NLME15_10
MGCDB84_TAE140nonMR_4	NLME15_11
GMTKN55_DC13_2	NLME15_12
GMTKN55_DIPCS10_9	NLME15_13
GMTKN55_G2RC_11	NLME15_14
GMTKN55_W4-11_139	NLME15_15
MN_MR-TM-BE13_12	NLMH7_1
MGCDB84_TAE140nonMR_103	NLMH7_2
MGCDB84_TAE140MR_132	NLMH7_3
MGCDB84_PlatonicTAE6_2	NLMH7_4
GMTKN55_W4-11_114	NLMH7_5
GMTKN55_W4-11_115	NLMH7_6
GMTKN55_W4-11_137	NLMH7_7
MN_MR-MGN-BE17_15	NLMR11_1
MN_MR-TMD-BE3_1	NLMR11_2
MN_MR-TMD-BE3_2	NLMR11_3
MN_MR-TMD-BE3_3	NLMR11_4
MGCDB84_PlatonicIG6_4	NLMR11_5
GMTKN55_MB16-43_5	NLMR11_6
GMTKN55_MB16-43_13	NLMR11_7
GMTKN55_MB16-43_20	NLMR11_8
GMTKN55_MB16-43_28	NLMR11_9
GMTKN55_MB16-43_38	NLMR11_10
GMTKN55_W4-11_131	NLMR11_11
MN_SR-TM-BE17_7	NLSIE9_1
MN_SR-MGN-BE107_12	NLSIE9_2
MGCDB84_PlatonicHD6_5	NLSIE9_3
MGCDB84_PlatonicHD6_6	NLSIE9_4
GMTKN55_BSR36_36	NLSIE9_5
GMTKN55_MB16-43_9	NLSIE9_6
GMTKN55_MB16-43_25	NLSIE9_7
GMTKN55_SIE4x4_6	NLSIE9_8
GMTKN55_SIE4x4_15	NLSIE9_9
GMTKN55_ISOL24_4	MBMH8_1
GMTKN55_MB16-43_7	MBMH8_2
GMTKN55_MB16-43_12	MBMH8_3
GMTKN55_MB16-43_17	MBMH8_4
GMTKN55_MB16-43_18	MBMH8_5
GMTKN55_MB16-43_19	MBMH8_6
GMTKN55_MB16-43_41	MBMH8_7
GMTKN55_MB16-43_43	MBMH8_8
MGCDB84_PlatonicIG6_6	MBH5_1
GMTKN55_MB16-43_4	MBH5_2
GMTKN55_MB16-43_15	MBH5_3
GMTKN55_MB16-43_16	MBH5_4
GMTKN55_MB16-43_40	MBH5_5
MN_DC9_6	MBVH7_1
GMTKN55_MB16-43_1	MBVH7_2
GMTKN55_MB16-43_2	MBVH7_3
GMTKN55_MB16-43_3	MBVH7_4
GMTKN55_MB16-43_24	MBVH7_5
GMTKN55_MB16-43_34	MBVH7_6
GMTKN55_MB16-43_37	MBVH7_7
MGCDB84_AE18_1	AE18pE_1
MGCDB84_AE18_2	AE18pE_2
MGCDB84_AE18_3	AE18pE_3
MGCDB84_AE18_4	AE18pE_4
MGCDB84_AE18_5	AE18pE_5
MGCDB84_AE18_6	AE18pE_6
MGCDB84_AE18_7	AE18pE_7
MGCDB84_AE18_8	AE18pE_8
MGCDB84_AE18_9	AE18pE_9
MGCDB84_AE18_10	AE18pE_10
MGCDB84_AE18_11	AE18pE_11
MGCDB84_AE18_12	AE18pE_12
MGCDB84_AE18_13	AE18pE_13
MGCDB84_AE18_14	AE18pE_14
MGCDB84_AE18_15	AE18pE_15
MGCDB84_AE18_16	AE18pE_16
MGCDB84_AE18_17	AE18pE_17
MGCDB84_AE18_18	AE18pE_18
